# Supplementary material for: A label-free and sensitive electrochemical aptasensor for thrombin based on the direct electron transfer of hemin and hemin@rGO nanosheets as the signal probe
Source: Royal Society of Chemistry journal article supplement (doi:10.1039/c5ay02136g), 2015-01-01
Supplement: c5ay02136g1.pdf [file c5ay02136g1.pdf]

## A label-free and sensitive electrochemical aptasensor for thrombin based on the direct electron transfer of hemin and hemin@rGO nanosheets as signal probe

Shuyan Xue, Huayu Yi, Yali Yuan, Pei Jing, Wenju Xu\*

*Key Laboratory on Luminescence and Real-Time Analytical Chemistry, Ministry of Education, School of Chemistry and Chemical Engineering, Southwest University, 400715, China*

The electrochemical response of the prepared electrochemical aptasensor was investigated at different scan rates, and the CV response obtained in 0.1 M PBS (pH 7.0) from  $-0.6$  to  $0.0$  V (vs. SCE) is shown in Fig. S1 (A). It can be seen that redox peak currents increased as the rising of scan rate in the range from  $20$  to  $350$   $\text{mV s}^{-1}$ . Moreover, as shown in Fig. S1 (B), a good linear relationship between the reductive peak current and the scan rates indicated the redox reaction at the electrode surface is a surface-controlled process.

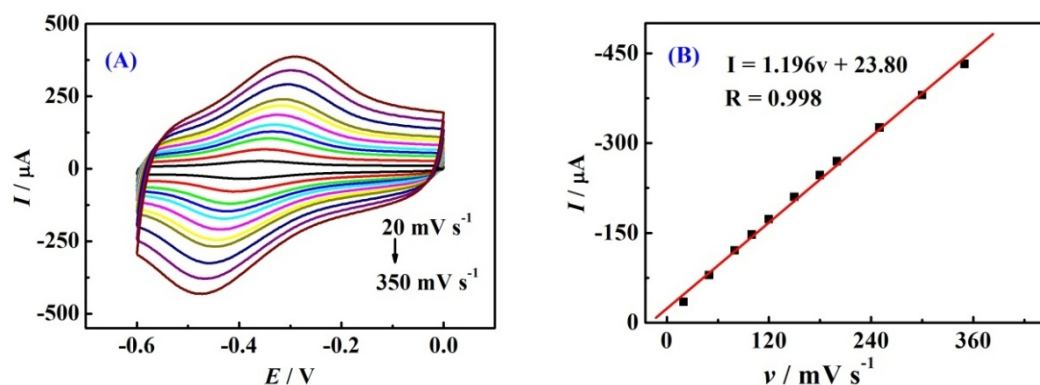

**Fig. S1** (A) CVs of the proposed aptasensor in 0.1 M PBS (pH 7.0) at different scan

rates (from inner to outer): 20, 50, 80, 100, 120, 150, 180, 200, 250, 300 and 350 mV s<sup>-1</sup>. (B) The dependence of the reductive peak currents on the scan rates

**Table S1** Comparison of analytical performances of the aptasensors for thrombin based on different detection methods

| Detection methods  | Linear range      | Detection limit | Reference |
|--------------------|-------------------|-----------------|-----------|
| CL                 | 0.0654 nM–6.54 nM | 8 pM            | 8         |
| CV                 | 0.002 nM–80 nM    | 1 pM            | 9         |
| ECL                | 0.01 nM–10 nM     | 3.8 pM          | 10        |
| ECL                | 0.001 nM–50 nM    | 0.7 pM          | 11        |
| DPV                | 0.001 nM–20 nM    | 0.5 pM          | 12        |
| Colorimetry        | 0.05 nM–50 nM     | 48 pM           | 13        |
| Fuorescence        | 0.062–2 nM        | 0.062 nM        | 14        |
| CV (direct method) | 1 pM–50 nM        | 0.45 pM         | This work |

**Abbreviation:** chemiluminescence (CL); cyclic voltammetry (CV); electrochemiluminescent (ECL); differential pulse voltammetry (DPV). <sup>a</sup> References 8-14 were shown in the manuscript References 8-14.
